# Supplementary material
Source: PubMed Central journal article supplement (PMC5508322)

**A**

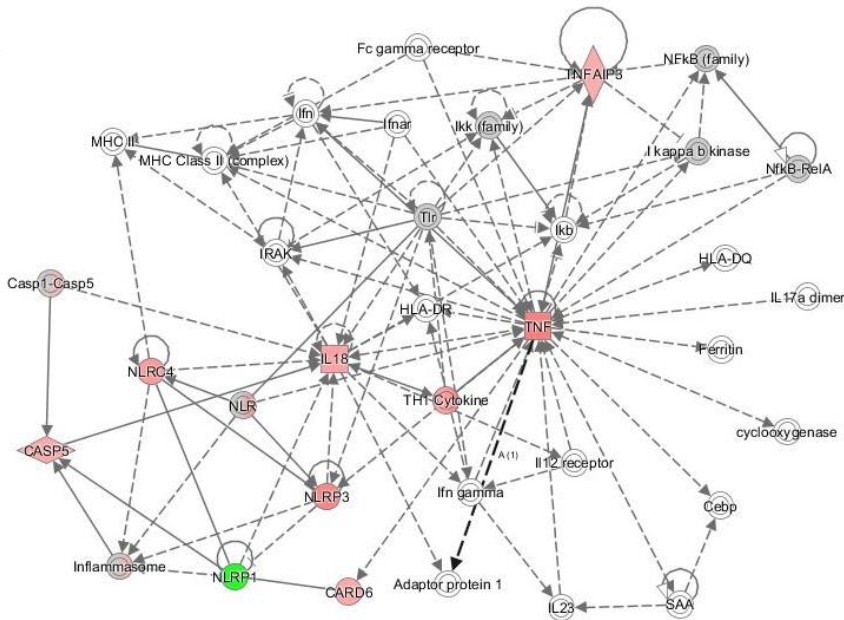

**B**

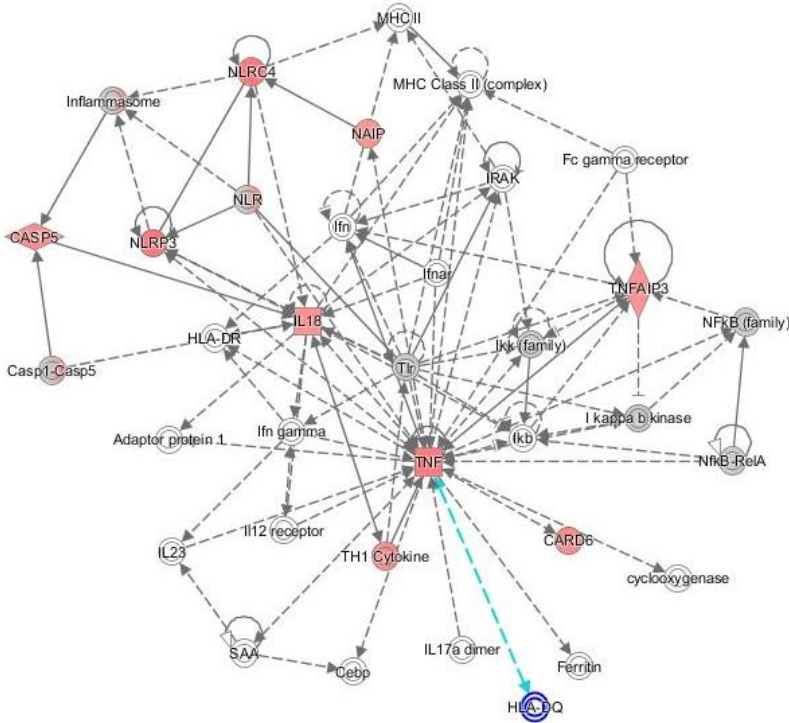

**C**

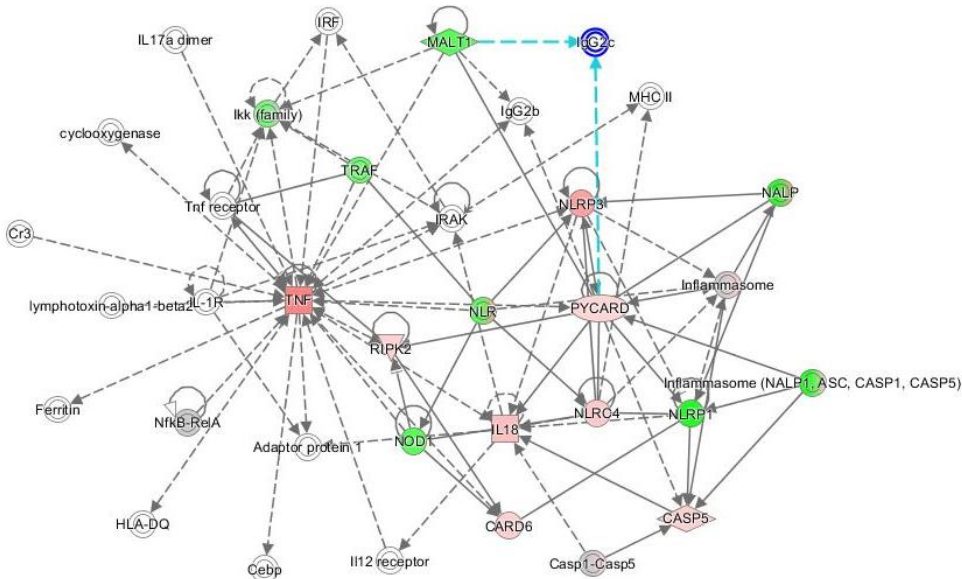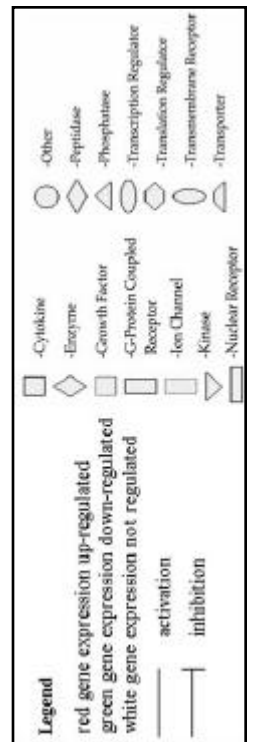

Supplement: CEI-189-232-s001.pdf [file CEI-189-232-s001.pdf]
